# Supplementary material
Source: HighWire-hosted journal article supplement (https://www.cmaj.ca/highwire/filestream/58770/field_highwire_adjunct_files/0/salon-detsky.pdf)
Supplement: salon-detsky.pdf [file salon-detsky.pdf]

## References

1. Kachalia A, Kaufman SR, Boothman R, et al. Liability claims and costs before and after implementation of a medical error disclosure program. *Ann Intern Med* 2010;153:213-21.
2. Gallagher TH, Studdert D, Levinson W. Disclosing harmful medical errors to patients. *N Engl J Med* 2007;356:2713-9.
3. MacDonald N, Attaran A. Medical errors, apologies and apology laws. *CMAJ* 2009;180:11.
4. Wu AW, Folkman S, McPhee SJ, et al. Do house officers learn from their mistakes? *JAMA* 1991;265:2089-94.
5. Ghalandarpoorattar SM, Kaviani A, Asghari F. Medical error disclosure: the gap between attitude and practice. *Postgrad Med J* 2012;88:130-3.
6. Wu AW, Steckelberg RC. Medical error, incidence investigation and the second victim: doing better but feeling worse? *BMJ Qual Saf* 2012;21:267-70.

**Acknowledgements:** The authors thank Allen B. Kachalia MD JD of Harvard University, Cambridge Mass. and Donald A. Redelmeier MD for their helpful comments on an earlier version of the manuscript.
